# Supplementary material for: The Exploitation of a Hempseed Byproduct to Produce Flavorings and Healthy Food Ingredients by a Fermentation Process
Source: MDPI journal article supplement (doi:10.3390/microorganisms9122418), 2021-11-23

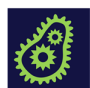

## Article

# The Exploitation of a Hempseed Byproduct to Produce Flavorings and Healthy Food Ingredients by a Fermentation Process

Lorenzo Nissen <sup>1,2</sup>, Flavia Casciano <sup>2</sup>, Elena Babini <sup>1,3</sup> and Andrea Gianotti <sup>1,2,3,\*</sup>

<sup>1</sup> CIRI (Interdepartmental Centre of Agri-Food Industrial Research), *Alma Mater Studiorum* - University of Bologna, P.za Goidanich 60, 47521 Cesena, Italy; lorenzo.nissen@unibo.it (L.N.); elena.babini2@unibo.it (E.B.)

<sup>2</sup> DISTAL (Department of Agricultural and Food Sciences), *Alma Mater Studiorum* - University of Bologna, V.le Fanin 44, 40127, Bologna, Italy; flavia.casciano2@unibo.it

<sup>3</sup> DISTAL (Department of Agricultural and Food Sciences), Campus of Food Sciences, *Alma Mater Studiorum* - University of Bologna, P.za Goidanich 60, 47521, Cesena, Italy

\* Correspondence: andrea.gianotti@unibo.it

## Supplementary Material

**Table S1.** MANOVA ( $P < 0.01$ ) categorized for the bacterial inocula and % of contribution to discrimination.

| VOCs                                | Type of Inoculum    |                    |                    |                    |                    |
|-------------------------------------|---------------------|--------------------|--------------------|--------------------|--------------------|
|                                     | NF*                 | C1112 (Lc)         | 98b (Lp)           | PRLF (Lr)          | mix (m)            |
| <b>Aldehydes</b>                    |                     |                    |                    |                    |                    |
| Hexanal                             | 99.04 <sup>a</sup>  | 0.04 <sup>b</sup>  | 0.75 <sup>b</sup>  | 0.00 <sup>b</sup>  | 0.16 <sup>b</sup>  |
| 2,4-Hexadienal, (E,E)-              | 100.00 <sup>a</sup> | 0.00 <sup>b</sup>  | 0.00 <sup>b</sup>  | 0.00 <sup>b</sup>  | 0.00 <sup>b</sup>  |
| 2,4-Heptadienal, 2,4-dimethyl-      | 77.49 <sup>a</sup>  | 0.00 <sup>c</sup>  | 0.00 <sup>c</sup>  | 22.51 <sup>b</sup> | 0.00 <sup>c</sup>  |
| 2,6-Octadienal, 3,7-dimethyl-       | 9.47 <sup>c</sup>   | 40.16 <sup>a</sup> | 23.85 <sup>b</sup> | 9.00 <sup>c</sup>  | 17.52 <sup>b</sup> |
| 2,4-Nonadienal, (E,E)-              | 100.00 <sup>a</sup> | 0.00 <sup>b</sup>  | 0.00 <sup>b</sup>  | 0.00 <sup>b</sup>  | 0.00 <sup>b</sup>  |
| 4-Nonanal                           | 80.45 <sup>a</sup>  | 0.00 <sup>c</sup>  | 19.55 <sup>b</sup> | 0.00 <sup>c</sup>  | 0.00 <sup>c</sup>  |
| 2-Decenal, (E)-                     | 33.69 <sup>b</sup>  | 0.00 <sup>c</sup>  | 0.00 <sup>c</sup>  | 58.86 <sup>a</sup> | 7.45 <sup>c</sup>  |
| 3-Heptadecenal                      | 0.00 <sup>b</sup>   | 0.00 <sup>b</sup>  | 2.60 <sup>b</sup>  | 3.93 <sup>b</sup>  | 93.47 <sup>a</sup> |
| Myrtenal                            | 20.90 <sup>b</sup>  | 11.38 <sup>c</sup> | 10.84 <sup>c</sup> | 49.09 <sup>a</sup> | 7.79 <sup>c</sup>  |
| <b>Alcohols</b>                     |                     |                    |                    |                    |                    |
| Geraniol                            | 91.19 <sup>a</sup>  | 8.81 <sup>b</sup>  | 0.00 <sup>c</sup>  | 0.00 <sup>c</sup>  | 0.00 <sup>c</sup>  |
| Terpinen-4-ol                       | 8.64 <sup>b</sup>   | 31.66 <sup>a</sup> | 23.83 <sup>a</sup> | 11.75 <sup>b</sup> | 24.13 <sup>a</sup> |
| Citronellol                         | 9.26 <sup>b</sup>   | 13.77 <sup>b</sup> | 21.00 <sup>a</sup> | 21.00 <sup>a</sup> | 34.97 <sup>a</sup> |
| Beta-Linalool                       | 7.70 <sup>b</sup>   | 34.22 <sup>a</sup> | 23.43 <sup>a</sup> | 7.48 <sup>b</sup>  | 27.17 <sup>a</sup> |
| p-Cymen-8-ol                        | 8.95 <sup>b</sup>   | 27.59 <sup>a</sup> | 26.69 <sup>a</sup> | 9.45 <sup>b</sup>  | 27.31 <sup>a</sup> |
| Fenchyl alcohol                     | 0.00 <sup>b</sup>   | 27.34 <sup>a</sup> | 23.51 <sup>a</sup> | 23.40 <sup>a</sup> | 25.75 <sup>a</sup> |
| 4(10)-Thujen-3-ol, acetate          | 10.05 <sup>b</sup>  | 57.11 <sup>a</sup> | 19.89 <sup>b</sup> | 12.95 <sup>b</sup> | 0.00 <sup>c</sup>  |
| Borneol                             | 1.61 <sup>c</sup>   | 49.17 <sup>a</sup> | 19.57 <sup>b</sup> | 8.67 <sup>c</sup>  | 20.98 <sup>b</sup> |
| Eucalyptol                          | 7.69 <sup>b</sup>   | 30.69 <sup>a</sup> | 25.92 <sup>a</sup> | 12.46 <sup>b</sup> | 23.24 <sup>a</sup> |
| trans-Pinocarveol                   | 0.00 <sup>c</sup>   | 25.31 <sup>a</sup> | 9.69 <sup>b</sup>  | 33.16 <sup>a</sup> | 31.84 <sup>a</sup> |
| Phenol, 2,4-bis(1,1-dimethylethyl)- | 39.16 <sup>a</sup>  | 7.57 <sup>c</sup>  | 16.83 <sup>b</sup> | 9.63 <sup>bc</sup> | 26.82 <sup>a</sup> |
| 4-EthylResorcinol                   | 68.26 <sup>a</sup>  | 14.26 <sup>b</sup> | 11.30 <sup>b</sup> | 4.02 <sup>c</sup>  | 2.17 <sup>c</sup>  |
| <b>Ketones</b>                      |                     |                    |                    |                    |                    |
| Acetone                             | 0.00 <sup>c</sup>   | 61.44 <sup>a</sup> | 16.35 <sup>b</sup> | 11.18 <sup>b</sup> | 11.02 <sup>b</sup> |
| Acetophenone                        | 0.00 <sup>c</sup>   | 31.03 <sup>a</sup> | 25.31 <sup>a</sup> | 15.63 <sup>b</sup> | 28.03 <sup>a</sup> |
| 2-Propanone, 1-hydroxy-             | 0.00 <sup>c</sup>   | 9.59 <sup>b</sup>  | 8.92 <sup>b</sup>  | 34.27 <sup>a</sup> | 47.22 <sup>a</sup> |
| 2,3-Butanedione                     | 0.54 <sup>d</sup>   | 50.09 <sup>a</sup> | 11.33 <sup>c</sup> | 27.81 <sup>b</sup> | 10.22 <sup>c</sup> |
| Butyrolactone                       | 0.00 <sup>c</sup>   | 12.13 <sup>b</sup> | 32.48 <sup>a</sup> | 12.68 <sup>b</sup> | 42.71 <sup>a</sup> |
| 2-Hexanone                          | 25.26 <sup>b</sup>  | 45.73 <sup>a</sup> | 1.41 <sup>c</sup>  | 27.25 <sup>b</sup> | 0.35 <sup>c</sup>  |
| cyclohexanone, 4-ethyl-             | 0.00 <sup>d</sup>   | 45.00 <sup>a</sup> | 29.35 <sup>b</sup> | 6.83 <sup>c</sup>  | 18.81 <sup>b</sup> |
| 2,5-Heptadien-4-one, 2,6-dimethyl-  | 2.47 <sup>b</sup>   | 24.56 <sup>a</sup> | 29.39 <sup>a</sup> | 22.73 <sup>a</sup> | 20.85 <sup>a</sup> |
| 3,5-Octadien-2-one, (E,E)-          | 33.42 <sup>a</sup>  | 9.33 <sup>b</sup>  | 17.31 <sup>b</sup> | 28.27 <sup>a</sup> | 11.66 <sup>b</sup> |

|                                           |                    |                    |                    |                    |                    |
|-------------------------------------------|--------------------|--------------------|--------------------|--------------------|--------------------|
| 6-Pentadecanone                           | 0.00 <sup>c</sup>  | 32.71 <sup>b</sup> | 67.29 <sup>a</sup> | 0.00 <sup>c</sup>  | 0.00 <sup>c</sup>  |
| Pinocarvone                               | 0.00 <sup>d</sup>  | 8.32 <sup>c</sup>  | 4.47 <sup>cd</sup> | 50.78 <sup>a</sup> | 36.44 <sup>b</sup> |
| <b>Organic Acids</b>                      |                    |                    |                    |                    |                    |
| Propanoic acid, hydroxy                   | 4.47               | 9.33               | 39.77              | 31.43              | 15.00              |
| Butanoic acid, 4-methoxy-                 | 70.79              | 6.51               | 4.46               | 8.21               | 10.04              |
| Hexanoic acid, 6-bromo-                   | 0.00               | 22.21              | 25.08              | 23.43              | 29.29              |
| Hexanoic acid, anhydride                  | 43.72              | 56.28              | 0.00               | 0.00               | 0.00               |
| Heptanoic acid                            | 0.00               | 15.81              | 29.42              | 25.13              | 29.64              |
| 2-Heptenoic acid                          | 0.00               | 10.53              | 55.50              | 21.75              | 12.22              |
| 12-Methylaminolauric acid                 | 70.59              | 29.41              | 0.00               | 0.00               | 0.00               |
| Oxalic acid                               | 0.00               | 51.26              | 25.02              | 3.77               | 19.95              |
| 4-(p-Anisalamino) cinnamic acid           | 0.00               | 43.11              | 17.07              | 20.29              | 19.52              |
| (9E,12Z) Linoleic acid                    | 0.00               | 0.00               | 0.00               | 33.95              | 66.05              |
| <b>Alkenes</b>                            |                    |                    |                    |                    |                    |
| alpha-Caryophyllene                       | 21.91              | 52.29              | 12.70              | 13.10              | 0.00               |
| Caryophyllene                             | 16.28              | 43.47              | 14.42              | 10.77              | 15.06              |
| Iminostilbene                             | 100.00             | 0.00               | 0.00               | 0.00               | 0.00               |
| o-cymene                                  | 55.05              | 0.00               | 18.68              | 26.27              | 0.00               |
| Gamma elemene                             | 10.19              | 2.20               | 1.29               | 0.00               | 86.32              |
| cis beta farnesene                        | 98.02              | 1.98               | 0.00               | 0.00               | 0.00               |
| Delta-3-carene                            | 5.33               | 22.99              | 22.30              | 3.94               | 45.44              |
| Gamma-terpinene                           | 57.95              | 20.14              | 12.77              | 9.15               | 0.00               |
| Aromadendrene                             | 67.24              | 0.00               | 2.55               | 4.39               | 25.82              |
| 9-methyldecalin                           | 76.33              | 6.85               | 9.06               | 0.00               | 7.76               |
| Beta-selinene                             | 83.39              | 4.15               | 6.65               | 0.00               | 5.81               |
| Alpha farnesene                           | 94.19              | 2.50               | 3.30               | 0.00               | 0.00               |
| Butylated Hydroxytoluene                  | 0.00               | 30.31              | 26.21              | 18.50              | 24.97              |
| <b>Amines</b>                             |                    |                    |                    |                    |                    |
| Piperazine                                | 86.40 <sup>a</sup> | 13.02 <sup>c</sup> | 0.58 <sup>b</sup>  | 0.00 <sup>d</sup>  | 0.00 <sup>d</sup>  |
| 1H-Pyrazole, 4,5-dihydro-3,5,5-trimethyl- | 0.00               | 46.27              | 19.84              | 25.13              | 8.76               |
| Diaziridine, 1,3,3-trimethyl-             | 0.00               | 53.34              | 16.06              | 22.76              | 7.84               |
| Hydrazine, 1,1-dimethyl-                  | 0.00               | 4.55               | 53.91              | 22.13              | 19.41              |
| 1-Propanamine, 3-methoxy-                 | 72.62              | 6.42               | 8.19               | 9.61               | 3.16               |
| 2-Butanamine, 3-methyl-                   | 35.04              | 16.27              | 2.61               | 3.83               | 42.26              |
| N-Benzyl-N-ethyl-p-isopropylbenzamide     | 2.07               | 17.58              | 34.91              | 21.71              | 23.73              |
| Pyrazine, methyl-                         | 1.07               | 28.75              | 24.16              | 19.04              | 26.98              |
| Cyanopinacolone                           | 0.00               | 47.64              | 20.37              | 19.74              | 12.25              |

<sup>a, b, c, d</sup> Values with different letters within a row are significantly different by Tukey's HSD (honestly significant difference) post hoc test  $P < 0.05$ . \*NF = not fermented samples; C1112 = *Lactocaseibacillus rhammosus* C1112; 98b = *Lactiplantibacillus plantarum* 98b; PRLF = *Limosilactobacillus fermentum* PRLF; mix = the bacterial mix of the three strains.

**Table S2.** MANOVA ( $P < 0.01$ ) categorized for the time points of fermentation and % of contribution to discrimination.

| VOCs                           | Time of Fermentation (h) |                    |                     |                    |                    |
|--------------------------------|--------------------------|--------------------|---------------------|--------------------|--------------------|
|                                | 0 h                      | 6 h                | 24 h                | 48 h               | 72 h               |
| <b>Aldehydes</b>               |                          |                    |                     |                    |                    |
| Butanal, 2-methyl-             | 68.75 <sup>a</sup>       | 26.37 <sup>b</sup> | 0.00 <sup>d</sup>   | 0.00 <sup>d</sup>  | 4.89 <sup>cd</sup> |
| Hexanal                        | 99.02 <sup>a</sup>       | 0.98 <sup>b</sup>  | 0.00 <sup>b</sup>   | 0.00 <sup>b</sup>  | 0.00 <sup>b</sup>  |
| 2,4-Hexadienal, (E,E)-         | 100.00 <sup>a</sup>      | 0.00 <sup>b</sup>  | 0.00 <sup>b</sup>   | 0.00 <sup>b</sup>  | 0.00 <sup>b</sup>  |
| 2,4-Heptadienal, 2,4-dimethyl- | 73.35 <sup>a</sup>       | 0.00 <sup>c</sup>  | 0.00 <sup>c</sup>   | 0.00 <sup>c</sup>  | 26.65 <sup>b</sup> |
| 2,4-Nonadienal, (E,E)-         | 100.00 <sup>a</sup>      | 0.00 <sup>b</sup>  | 0.00 <sup>b</sup>   | 0.00 <sup>b</sup>  | 0.00 <sup>b</sup>  |
| 4-Nonanal                      | 80.45 <sup>a</sup>       | 19.55 <sup>b</sup> | 0.00 <sup>c</sup>   | 0.00 <sup>c</sup>  | 0.00 <sup>c</sup>  |
| Myrtenal                       | 9.89 <sup>b</sup>        | 31.90 <sup>a</sup> | 45.42 <sup>a</sup>  | 8.16 <sup>b</sup>  | 4.63 <sup>b</sup>  |
| Benzaldehyde                   | 32.27 <sup>a</sup>       | 54.01 <sup>a</sup> | 9.86 <sup>b</sup>   | 1.29 <sup>b</sup>  | 2.57 <sup>b</sup>  |
| Benzaldehyde, 3,4-dimethyl-    | 8.98 <sup>b</sup>        | 39.08 <sup>a</sup> | 14.37 <sup>ab</sup> | 28.97 <sup>a</sup> | 8.59 <sup>b</sup>  |
| <b>Alcohols</b>                |                          |                    |                     |                    |                    |
| Geraniol                       | 91.22 <sup>a</sup>       | 8.78 <sup>b</sup>  | 0.00 <sup>c</sup>   | 0.00 <sup>c</sup>  | 0.00 <sup>c</sup>  |
| Terpinen-4-ol                  | 10.18 <sup>b</sup>       | 20.72 <sup>a</sup> | 23.36 <sup>a</sup>  | 24.94 <sup>a</sup> | 20.80 <sup>a</sup> |
| Citronellol                    | 9.26 <sup>b</sup>        | 6.52 <sup>b</sup>  | 7.77 <sup>b</sup>   | 37.66 <sup>a</sup> | 38.78 <sup>a</sup> |

|                                              |                    |                     |                     |                     |                     |
|----------------------------------------------|--------------------|---------------------|---------------------|---------------------|---------------------|
| Beta-Linalool                                | 7.70 <sup>c</sup>  | 22.42 <sup>ab</sup> | 32.85 <sup>a</sup>  | 19.75 <sup>b</sup>  | 17.28 <sup>b</sup>  |
| 2-Decen-1-ol,(E)-                            | 6.26 <sup>b</sup>  | 8.18 <sup>b</sup>   | 32.84 <sup>a</sup>  | 42.36 <sup>a</sup>  | 10.35 <sup>b</sup>  |
| 2,4-Decadien-1-ol, (E,E)-                    | 0.00 <sup>c</sup>  | 2.36 <sup>c</sup>   | 16.61 <sup>b</sup>  | 75.05 <sup>a</sup>  | 5.98 <sup>bc</sup>  |
| p-Cymen-8-ol                                 | 8.95 <sup>b</sup>  | 22.06 <sup>a</sup>  | 25.23 <sup>a</sup>  | 24.97 <sup>a</sup>  | 18.78 <sup>a</sup>  |
| 1,3;2,4-Dimethylene-d-epirhamnitol           | 0.00 <sup>c</sup>  | 9.72 <sup>b</sup>   | 6.60 <sup>b</sup>   | 83.68 <sup>a</sup>  | 0.00 <sup>c</sup>   |
| Fenchyl alcohol                              | 0.00 <sup>b</sup>  | 22.49 <sup>a</sup>  | 27.46 <sup>a</sup>  | 26.74 <sup>a</sup>  | 23.30 <sup>a</sup>  |
| 4(10)-Thujen-3-ol, acetate                   | 10.07 <sup>c</sup> | 22.70 <sup>b</sup>  | 38.04 <sup>a</sup>  | 11.10 <sup>c</sup>  | 18.09 <sup>bc</sup> |
| Borneol                                      | 1.61 <sup>b</sup>  | 27.39 <sup>a</sup>  | 29.48 <sup>a</sup>  | 22.82 <sup>a</sup>  | 18.70 <sup>a</sup>  |
| Eucalyptol                                   | 7.69 <sup>c</sup>  | 22.53 <sup>ab</sup> | 33.95 <sup>a</sup>  | 13.58 <sup>b</sup>  | 22.24 <sup>ab</sup> |
| Eugenol                                      | 76.55 <sup>a</sup> | 0.00 <sup>c</sup>   | 0.00 <sup>c</sup>   | 0.00 <sup>c</sup>   | 23.45 <sup>b</sup>  |
| trans-Pinocarveol                            | 2.66 <sup>c</sup>  | 26.55 <sup>ab</sup> | 15.28 <sup>b</sup>  | 34.56 <sup>a</sup>  | 20.95 <sup>ab</sup> |
| p-vinylguaiaicol                             | 0.00 <sup>d</sup>  | 4.24 <sup>c</sup>   | 74.72 <sup>a</sup>  | 20.89 <sup>b</sup>  | 0.15 <sup>d</sup>   |
| 4-EthylResorcinol                            | 68.26 <sup>a</sup> | 13.03 <sup>b</sup>  | 9.70 <sup>bc</sup>  | 5.71 <sup>cd</sup>  | 3.30 <sup>d</sup>   |
| <b>Ketones</b>                               |                    |                     |                     |                     |                     |
| Acetone                                      | 0.00 <sup>c</sup>  | 59.21 <sup>a</sup>  | 11.28 <sup>b</sup>  | 19.37 <sup>b</sup>  | 10.14 <sup>b</sup>  |
| Acetophenone                                 | 0.00 <sup>b</sup>  | 38.86 <sup>a</sup>  | 0.00 <sup>b</sup>   | 36.06 <sup>a</sup>  | 25.08 <sup>a</sup>  |
| 2-Butanone, 3-hydroxy-                       | 0.00 <sup>d</sup>  | 0.46 <sup>d</sup>   | 31.48 <sup>b</sup>  | 57.17 <sup>a</sup>  | 10.89 <sup>c</sup>  |
| Butyrolactone                                | 0.00 <sup>b</sup>  | 0.00 <sup>b</sup>   | 0.00 <sup>b</sup>   | 41.12 <sup>a</sup>  | 58.88 <sup>a</sup>  |
| 2-Hexanone, 4-methyl-                        | 0.00 <sup>b</sup>  | 25.27 <sup>a</sup>  | 28.86 <sup>a</sup>  | 27.61 <sup>a</sup>  | 18.26 <sup>a</sup>  |
| 2-Heptanone, 4,6-dimethyl-                   | 0.00 <sup>c</sup>  | 31.29 <sup>a</sup>  | 22.19 <sup>ab</sup> | 27.94 <sup>a</sup>  | 18.59 <sup>b</sup>  |
| 2,5-Heptadien-4-one, 2,6-dimethyl-           | 2.47 <sup>c</sup>  | 31.16 <sup>a</sup>  | 22.09 <sup>ab</sup> | 26.20 <sup>ab</sup> | 18.08 <sup>b</sup>  |
| 2,3-Octanedione                              | 0.00 <sup>c</sup>  | 12.60 <sup>b</sup>  | 87.40 <sup>a</sup>  | 0.00 <sup>c</sup>   | 0.00 <sup>c</sup>   |
| 6-Pentadecanone                              | 0.00 <sup>c</sup>  | 28.41 <sup>b</sup>  | 71.59 <sup>a</sup>  | 0.00 <sup>c</sup>   | 0.00 <sup>c</sup>   |
| Pinocarvone                                  | 0.00 <sup>d</sup>  | 0.00 <sup>d</sup>   | 23.23 <sup>b</sup>  | 74.52 <sup>a</sup>  | 2.24 <sup>c</sup>   |
| <b>Organic acids</b>                         |                    |                     |                     |                     |                     |
| Propanoic acid, hydroxy                      | 11.96 <sup>c</sup> | 0.85 <sup>d</sup>   | 11.23 <sup>c</sup>  | 20.00 <sup>b</sup>  | 55.95 <sup>a</sup>  |
| Butanoic acid, 4-methoxy-                    | 93.75 <sup>a</sup> | 0.00 <sup>c</sup>   | 0.00 <sup>c</sup>   | 6.25 <sup>b</sup>   | 0.00 <sup>c</sup>   |
| Hexanoic acid, 6-bromo-                      | 0.00 <sup>c</sup>  | 0.00 <sup>c</sup>   | 0.00 <sup>c</sup>   | 12.34 <sup>b</sup>  | 87.66 <sup>a</sup>  |
| Hexanoic acid, anhydride                     | 11.01 <sup>c</sup> | 41.13 <sup>a</sup>  | 26.57 <sup>b</sup>  | 12.57 <sup>c</sup>  | 8.72 <sup>c</sup>   |
| Heptanoic acid                               | 36.72 <sup>a</sup> | 7.53 <sup>c</sup>   | 12.12 <sup>bc</sup> | 20.00 <sup>b</sup>  | 23.63 <sup>b</sup>  |
| 2-Heptenoic acid                             | 18.69 <sup>b</sup> | 7.23 <sup>c</sup>   | 0.00 <sup>d</sup>   | 18.55 <sup>b</sup>  | 55.53 <sup>a</sup>  |
| 12-Methylaminolauric acid                    | 28.17 <sup>a</sup> | 28.17 <sup>a</sup>  | 10.18 <sup>b</sup>  | 10.95 <sup>b</sup>  | 22.55 <sup>a</sup>  |
| Oxalic acid                                  | 23.48 <sup>a</sup> | 25.25 <sup>a</sup>  | 22.46 <sup>a</sup>  | 20.00 <sup>a</sup>  | 8.81 <sup>b</sup>   |
| 4-(p-Anisalamino) cinnamic acid              | 4.08 <sup>c</sup>  | 3.83 <sup>c</sup>   | 19.92 <sup>b</sup>  | 63.77 <sup>a</sup>  | 8.40 <sup>b</sup>   |
| (9E,12Z) Linoleic acid                       | 0.00 <sup>a</sup>  | 13.16 <sup>b</sup>  | 13.16 <sup>b</sup>  | 13.16 <sup>b</sup>  | 60.52 <sup>a</sup>  |
| <b>Alkenes</b>                               |                    |                     |                     |                     |                     |
| beta-Pinene                                  | 78.16 <sup>a</sup> | 21.84 <sup>b</sup>  | 0.00 <sup>c</sup>   | 0.00 <sup>c</sup>   | 0.00 <sup>c</sup>   |
| Iminostilbene                                | 85.99 <sup>a</sup> | 14.01 <sup>b</sup>  | 0.00 <sup>c</sup>   | 0.00 <sup>c</sup>   | 0.00 <sup>c</sup>   |
| Terpinolene                                  | 7.40 <sup>b</sup>  | 40.40 <sup>a</sup>  | 52.21 <sup>a</sup>  | 0.00 <sup>c</sup>   | 0.00 <sup>c</sup>   |
| cis beta farnesene                           | 90.22 <sup>a</sup> | 7.96 <sup>b</sup>   | 1.82 <sup>c</sup>   | 0.00 <sup>d</sup>   | 0.00 <sup>d</sup>   |
| Delta-3-carene                               | 5.33 <sup>b</sup>  | 35.52 <sup>a</sup>  | 28.61 <sup>a</sup>  | 25.04 <sup>a</sup>  | 5.49 <sup>b</sup>   |
| Gamma-terpinene                              | 57.95 <sup>a</sup> | 21.76 <sup>b</sup>  | 4.25 <sup>c</sup>   | 16.04 <sup>b</sup>  | 0.00 <sup>d</sup>   |
| Aromadendrene                                | 65.68 <sup>a</sup> | 33.16 <sup>b</sup>  | 0.58 <sup>c</sup>   | 0.58 <sup>c</sup>   | 0.00 <sup>d</sup>   |
| 9-methyldecalin                              | 76.33 <sup>a</sup> | 14.67 <sup>b</sup>  | 6.88 <sup>c</sup>   | 2.12 <sup>d</sup>   | 0.00 <sup>c</sup>   |
| Beta-selinene                                | 83.39 <sup>a</sup> | 7.61 <sup>b</sup>   | 4.86 <sup>b</sup>   | 4.15 <sup>b</sup>   | 0.00 <sup>c</sup>   |
| Alpha-farnesene                              | 94.19 <sup>a</sup> | 2.50 <sup>b</sup>   | 1.96 <sup>c</sup>   | 0.65 <sup>d</sup>   | 0.70 <sup>d</sup>   |
| 2-Pentene, 2,3-dimethyl-                     | 0.67 <sup>b</sup>  | 5.83 <sup>b</sup>   | 2.23 <sup>b</sup>   | 91.28 <sup>a</sup>  | 0.00 <sup>c</sup>   |
| 1-Cyclohexene-1-methanol                     | 5.58 <sup>c</sup>  | 10.85 <sup>b</sup>  | 83.43 <sup>a</sup>  | 0.14 <sup>d</sup>   | 0.00 <sup>d</sup>   |
| 4-Trimethylsilyl-9,9-dimethyl-9-silafluorene | 0.00 <sup>d</sup>  | 0.00 <sup>d</sup>   | 4.20 <sup>c</sup>   | 57.47 <sup>a</sup>  | 38.33 <sup>b</sup>  |
| Butylated Hydroxytoluene                     | 0.00 <sup>b</sup>  | 0.00 <sup>b</sup>   | 35.94 <sup>a</sup>  | 30.67 <sup>a</sup>  | 33.39 <sup>a</sup>  |
| <b>Amines</b>                                |                    |                     |                     |                     |                     |
| Piperazine                                   | 90.44 <sup>a</sup> | 3.00 <sup>c</sup>   | 6.57 <sup>b</sup>   | 0.00 <sup>d</sup>   | 0.00 <sup>d</sup>   |
| 1H-Pyrazole, 4,5-dihydro-3,5,5-trimethyl-    | 0.00 <sup>d</sup>  | 25.99 <sup>b</sup>  | 44.21 <sup>a</sup>  | 11.25 <sup>c</sup>  | 18.55 <sup>bc</sup> |
| Hydrazine, 1,1-dimethyl-                     | 0.00 <sup>d</sup>  | 8.54 <sup>c</sup>   | 18.64 <sup>b</sup>  | 55.98 <sup>a</sup>  | 16.84 <sup>b</sup>  |
| 1-Propanamine, 3-methoxy-                    | 72.62 <sup>a</sup> | 1.64 <sup>c</sup>   | 7.36 <sup>b</sup>   | 7.76 <sup>b</sup>   | 10.62 <sup>b</sup>  |
| Propanamide, 2-methyl-                       | 8.64 <sup>c</sup>  | 28.63 <sup>b</sup>  | 62.73 <sup>a</sup>  | 0.00 <sup>d</sup>   | 0.00 <sup>d</sup>   |
| Pyrazine, 2,3-dimethyl-                      | 75.72 <sup>a</sup> | 4.89 <sup>c</sup>   | 0.47 <sup>d</sup>   | 2.14 <sup>cd</sup>  | 16.78 <sup>b</sup>  |
| Pyrazine, methyl-                            | 1.07 <sup>c</sup>  | 31.08 <sup>a</sup>  | 22.68 <sup>ab</sup> | 27.22 <sup>ab</sup> | 17.95 <sup>b</sup>  |

a, b, c, d Values with different letters within a row are significantly different by Tukey's HSD (honestly significant difference) post hoc test ( $P < 0.05$ ).

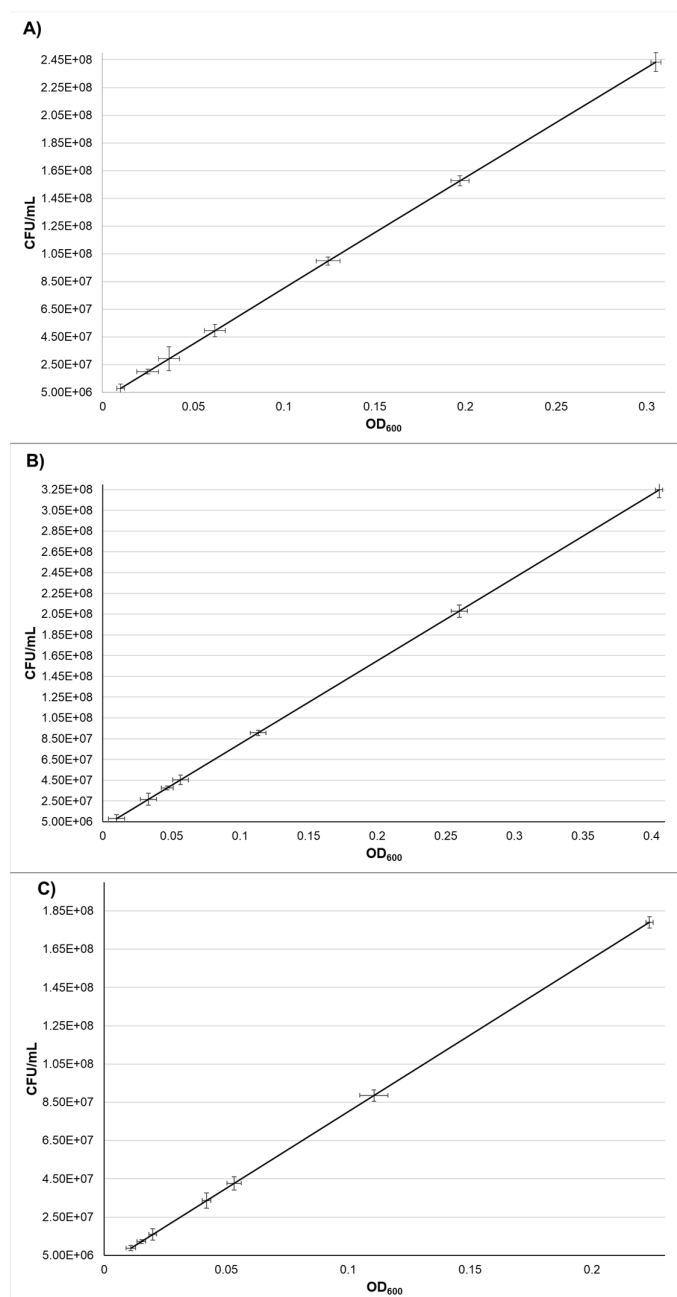

**Figure S1.** Calibration curves for the spectrophotometric evaluation (Optical Density at 600 nm) of bacterial cell loads (CFU/mL). (A) Lr = HSB fermented by *Lactocaseibacillus rhamnosus* C1112; (B) Lp = HSB fermented by *Lactiplantibacillus plantarum* 98b; (C) Lf = HSB fermented by *Limosilactobacillus fermentum* PRLF.

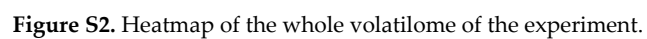

Supplement: s1 [file s1]
